# Supplementary material
Source: Springer Nature journal article supplement (https://www.springermedizin.de/resource/supplementary/12884_2013_970_MOESM2_ESM.pdf/9459358)

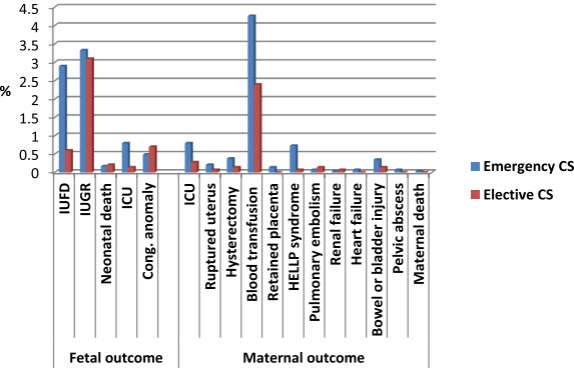

Supplement: MOESM2 [file 9459358]
